# Supplementary material for: Intraoral Image Generation by Progressive Growing of Generative Adversarial Network and Evaluation of Generated Image Quality by Dentists
Source: Research Square preprint supplement (doi:10.21203/rs.3.rs-117942/v1), 2020-12-02
Supplement: Supplementary file 1 [file 3924f33c9a96b7b50014e9dc.pdf]

**Table II**

SWD values of each resolution with and without data augmentation. A small value of SWD indicates that the true images and generated images seem to be similar in both appearance and variation.

| Resolutions | Augmentation |       |
|-------------|--------------|-------|
|             | Not used     | Used  |
| 128x128     | 5.77         | 4.25  |
| 256x256     | 5.49         | 4.68  |
| 512x512     | 5.58         | 5.45  |
| 1,024x1,024 | 9.23         | 12.57 |
