# Supplementary material for: Intraoral Image Generation by Progressive Growing of Generative Adversarial Network and Evaluation of Generated Image Quality by Dentists
Source: Research Square preprint supplement (doi:10.21203/rs.3.rs-117942/v1), 2020-12-02
Supplement: Supplementary file 2 [file 46bcb4eacb2546ece1f75a0c.pdf]

**Table I**

Check of normality of each answer with the Shapiro-Wilk test and the check of equal variances with Bartlett's test. All p-values were more than 0.05, which indicated that all answers were considered to have normal distribution and equal variances.

| Answers     | Shapiro-Wilk test | Bartlett's test |
|-------------|-------------------|-----------------|
| 128x128     | 0.9669            |                 |
| 256x256     | 0.1934            |                 |
| 512x512     | 0.2358            | 0.9938          |
| 1,024x1,024 | 0.4393            |                 |
